# Supplementary material
Source: Copernicus journal article supplement (doi:10.5194/esurf-14-469-2026)
Supplement: Supplementary file [file esurf-14-469-2026-supplement-title-page.pdf › esurf-14-469-2026-supplement-title-page.pdf]

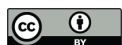

## *Supplement of*

# **Grain roughness controls on velocity and bed stress fields around a fully protruding obstacle in supercritical flow**

**Angel Monsalve and Oscar Link**

*Correspondence to:* Angel Monsalve (amonsalve@uidaho.edu)

- esurf-14-469-2026-supplement-title-page.pdf
- Figure S1.pdf

The copyright of individual parts of the supplement might differ from the article licence.
