# Supplementary material
Source: Copernicus journal article supplement (doi:10.5194/esurf-14-469-2026)

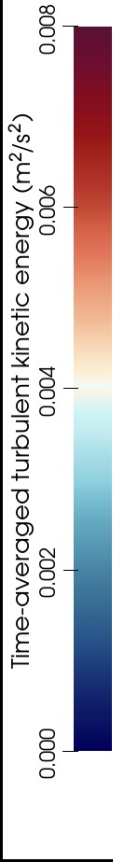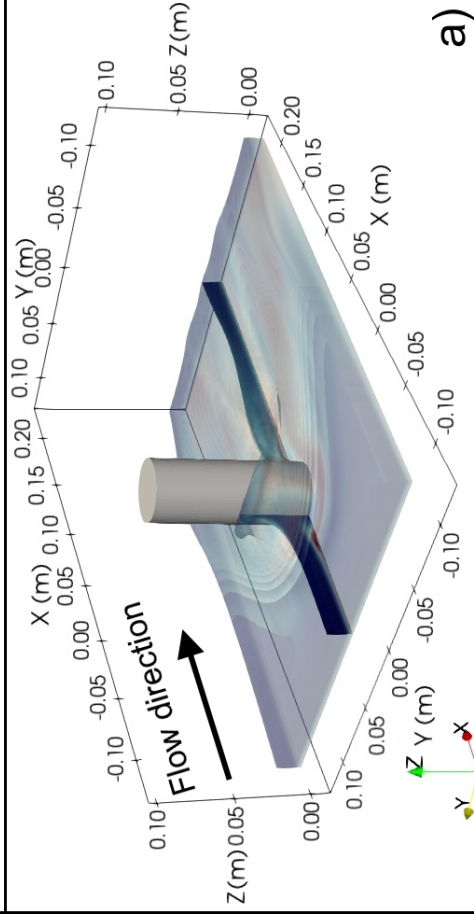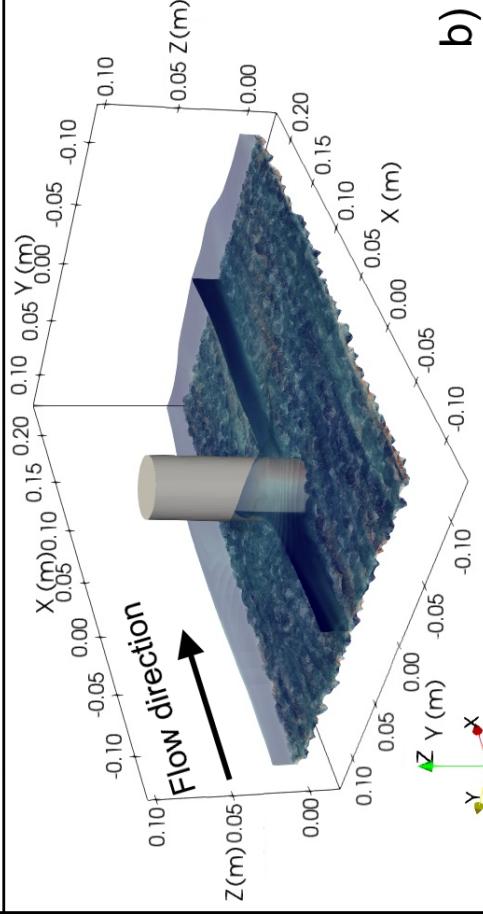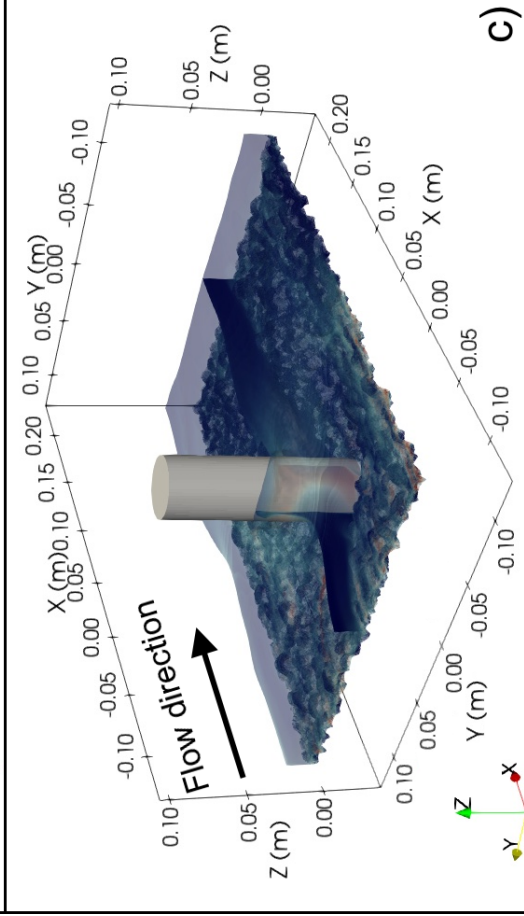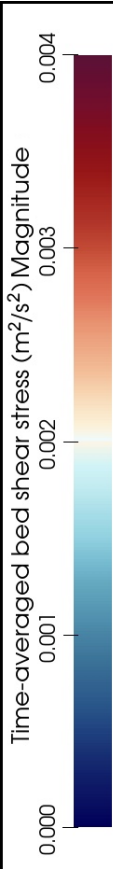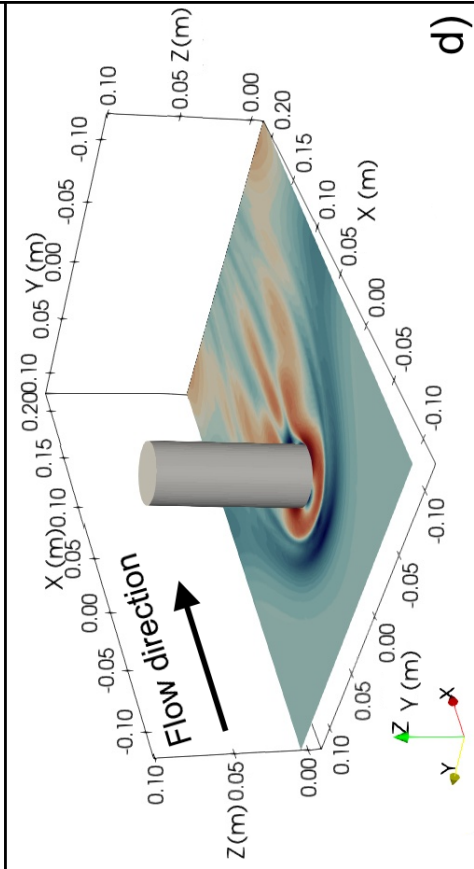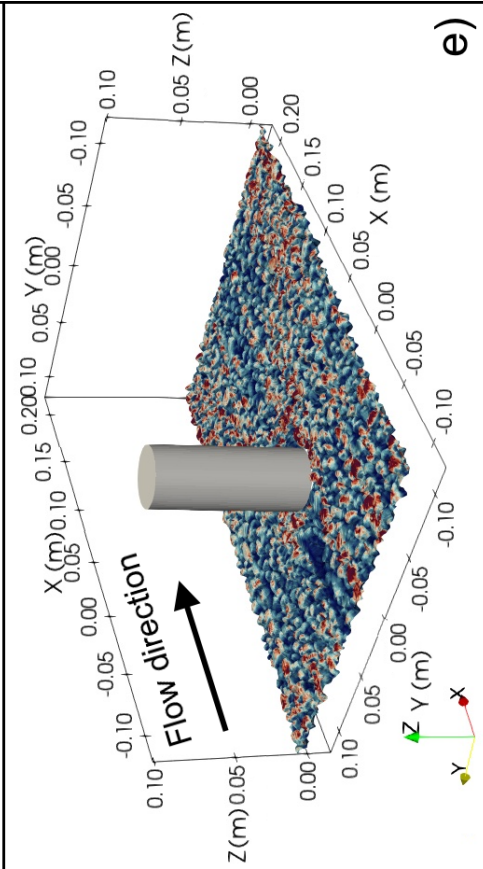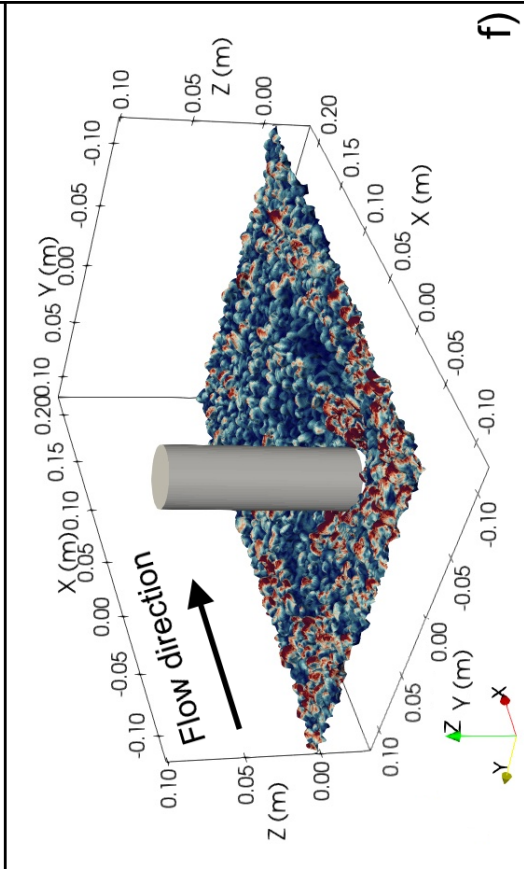

Supplement: Supplementary file 1 [file Figure S1.pdf › Figure S1.pdf]
